# Supplementary material
Source: PubMed Central journal article supplement (PMC6390686)
Supplement: MD-010-C8MD00537K-s001.pdf [file MD-010-C8MD00537K-s001.pdf]

## Neuropilin-1 peptide-like ligands with proline mimetics, tested using the improved chemiluminescence affinity detection method

Anna K. Puszko, <sup>\*a</sup> Piotr Sosnowski, <sup>b</sup> Dagmara Tymecka, <sup>a</sup> Françoise Raynaud, <sup>c,d,e</sup> Olivier Hermine, <sup>c,d,e</sup> Yves Lepelletier, <sup>c,d,e</sup> and Aleksandra Misicka <sup>\*a,b</sup>

<sup>a</sup> Faculty of Chemistry, University of Warsaw, Pasteura 1, 02-093 Warsaw, Poland

<sup>b</sup> Department of Neuropeptides, Mossakowski Medical Research Centre, Polish Academy of Sciences, Pawinskiego 5, 02-106 Warsaw, Poland

<sup>c</sup> Imagine Institute, Paris Descartes University–Sorbonne Paris Cité, 24 boulevard Montparnasse, 75015 Paris, France

<sup>d</sup> Laboratory of cellular and molecular basis of normal hematopoiesis and hematological disorders: therapeutic implications, INSERM UMR 1163, 24 boulevard Montparnasse, 75015 Paris, France

<sup>e</sup> CNRS ERL 8254, 24 boulevard Montparnasse, 75015 Paris, France

\* Corresponding authors. Faculty of Chemistry, University of Warsaw, Pasteura 1, 02-093 Warsaw, Poland. E-mail address: misicka@chem.uw.edu.pl (A. Misicka), apuszko@chem.uw.edu.pl (A. K. Puszko)

### SUPPORTING INFORMATION

#### Contents

|                                                                                              |    |
|----------------------------------------------------------------------------------------------|----|
| 1. General scheme of the synthesis.....                                                      | 2  |
| 2. Analytical data.....                                                                      | 2  |
| 3. Analytical data of plasma degradation.....                                                | 3  |
| 4. Dose-response curves of the best analogues used to calculate IC <sub>50</sub> values..... | 11 |

## 1. General scheme of the synthesis.

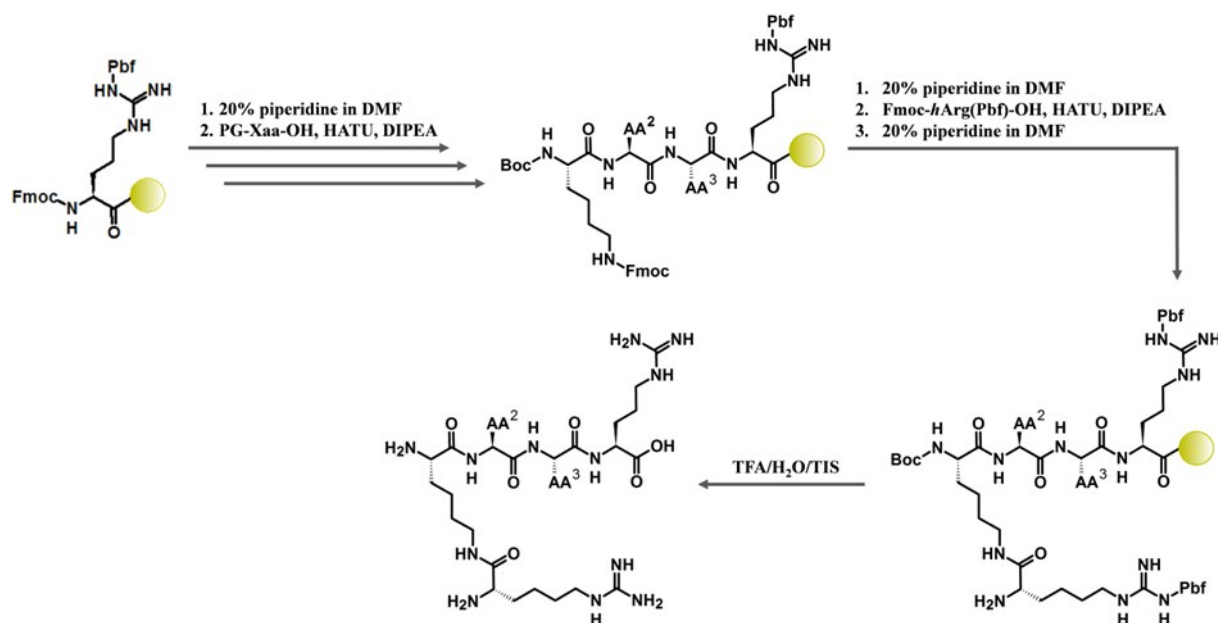

**Scheme S1.** General scheme of peptidomimetics synthesis on the solid support.

**2. Analytical data.** Purity of compounds (> 98%) was determined using RP-HPLC. Analysis of pure products was carried out by HPLC with a Prominence HPLC system (binary pump system LC-20AD and autosampler SIL-20AC HT coupled to a SPD-20A UV detector and LCMS-2020 quadrupole mass detector). Chromatographic separation was achieved on Phenomenex Jupiter Proteo C12 column (250 × 4.6 mm) at 35°C. Mobile phases consisted of H<sub>2</sub>O:TFA (99.95:0.05 v/v, phase A) and ACN : TFA (99.95:0.05 v/v, phase B) at a flow rate of 1.2 mL/min. Elution was performed with gradients as follows:

Method 1:

0 – 2 min 0%; 2 – 22 min 40%;

Method 2:

0 – 3 min 0%; 3 – 23 min 18%;

1 mg/ml solution of each compound was prepared in H<sub>2</sub>O and 10 μL was injected. UV spectra were recorded at 190 nm. Purity of compounds was estimated using peak area.

High resolution mass spectra (HRMS) were recorded on a Shimadzu LCMS-IT-TOF with ESI ionization source. Flow rate of mobile phase (water : acetonitrile : formic acid 49.75:49.75:0.05 v/v/v) was set at 0.2 mL/min. 1 mg/ml solution of each compound was prepared in H<sub>2</sub>O and 0.1 μL was injected.

The electrospray ionization (ESI) was operated in positive mode. Nitrogen was used as nebulizing gas, set at 1.5 ml/min and drying gas set at pressure 101 kPa. Desolvation line and

heat block temperature were set at 220°C. Needle voltage was set at +4.5 kV (positive mode) and -3.5kV (negative mode). Detector voltage was set to -1.76kV. Mass spectrometer was used in scan mode in range 250-2000 *m/z* (positive mode) and 100-1400 *m/z* (negative mode). Theoretical [M+H]<sup>+</sup> value and error was calculated using Formula Predictor tool integrated with spectrometer operating software.

**Table S1.** HPLC analytical data of compounds **1-22**.

| <b>Compound</b> | <b>Yield</b> | <b>RT [min]</b> | <b>Molecular formula</b>                                       |
|-----------------|--------------|-----------------|----------------------------------------------------------------|
| <b>1</b>        | 49%          | 15.04*          | C <sub>40</sub> H <sub>61</sub> N <sub>11</sub> O <sub>9</sub> |
| <b>2</b>        | 51%          | 11.63           | C <sub>29</sub> H <sub>54</sub> N <sub>12</sub> O <sub>6</sub> |
| <b>3</b>        | 47%          | 9.59            | C <sub>28</sub> H <sub>55</sub> N <sub>13</sub> O <sub>6</sub> |
| <b>4</b>        | 52%          | 10.44           | C <sub>27</sub> H <sub>52</sub> N <sub>12</sub> O <sub>6</sub> |
| <b>5</b>        | 47%          | 8.99            | C <sub>29</sub> H <sub>54</sub> N <sub>12</sub> O <sub>8</sub> |
| <b>6</b>        | 66%          | 10.12           | C <sub>27</sub> H <sub>50</sub> N <sub>12</sub> O <sub>6</sub> |
| <b>7</b>        | 48%          | 10.23           | C <sub>29</sub> H <sub>50</sub> N <sub>12</sub> O <sub>6</sub> |
| <b>8</b>        | 44%          | 21.81           | C <sub>37</sub> H <sub>66</sub> N <sub>12</sub> O <sub>6</sub> |
| <b>9</b>        | 29%          | 4.95            | C <sub>29</sub> H <sub>56</sub> N <sub>14</sub> O <sub>6</sub> |
| <b>10</b>       | 21%          | 22.75           | C <sub>39</sub> H <sub>58</sub> N <sub>12</sub> O <sub>6</sub> |
| <b>11</b>       | 49%          | 5.98            | C <sub>28</sub> H <sub>55</sub> N <sub>13</sub> O <sub>7</sub> |
| <b>12</b>       | 66%          | 8.71            | C <sub>27</sub> H <sub>53</sub> N <sub>13</sub> O <sub>6</sub> |
| <b>13</b>       | 59%          | 9.37            | C <sub>28</sub> H <sub>53</sub> N <sub>13</sub> O <sub>6</sub> |
| <b>14</b>       | 53%          | 14.28           | C <sub>32</sub> H <sub>61</sub> N <sub>13</sub> O <sub>6</sub> |
| <b>15</b>       | 29%          | 5.02            | C <sub>28</sub> H <sub>56</sub> N <sub>14</sub> O <sub>6</sub> |
| <b>16</b>       | 28%          | 14.56           | C <sub>33</sub> H <sub>57</sub> N <sub>13</sub> O <sub>6</sub> |
| <b>17</b>       | 37%          | 9.26            | C <sub>27</sub> H <sub>52</sub> N <sub>12</sub> O <sub>7</sub> |
| <b>18</b>       | 49%          | 9.77            | C <sub>26</sub> H <sub>50</sub> N <sub>12</sub> O <sub>6</sub> |
| <b>19</b>       | 58%          | 9.85            | C <sub>27</sub> H <sub>50</sub> N <sub>12</sub> O <sub>6</sub> |
| <b>20</b>       | 51%          | 15.47           | C <sub>31</sub> H <sub>58</sub> N <sub>12</sub> O <sub>6</sub> |
| <b>21</b>       | 31%          | 8.75            | C <sub>27</sub> H <sub>53</sub> N <sub>13</sub> O <sub>6</sub> |
| <b>22</b>       | 33%          | 15.91           | C <sub>32</sub> H <sub>54</sub> N <sub>12</sub> O <sub>6</sub> |

\* Compound was analysed using method 1. The rest of compounds were analysed using method 2.

**Table S2.** HRMS analytical data of compounds **1-22**.

| <b>Compound</b> | <b>Molecular formula</b>                                       | <b>[M+H]<sup>+</sup> calculated</b> | <b>[M+H]<sup>+</sup> found</b> | <b>Error [ppm]</b> | <b>[M+2H]<sup>2+</sup> calculated</b> | <b>[M+2H]<sup>2+</sup> found</b> | <b>Error [ppm]</b> | <b>[M-H]<sup>-</sup> calculated</b> | <b>[M-H]<sup>-</sup> found</b> | <b>Error [ppm]</b> |
|-----------------|----------------------------------------------------------------|-------------------------------------|--------------------------------|--------------------|---------------------------------------|----------------------------------|--------------------|-------------------------------------|--------------------------------|--------------------|
| <b>1</b>        | C <sub>40</sub> H <sub>61</sub> N <sub>11</sub> O <sub>9</sub> | 840.4726                            | -                              | -                  | 420.7400                              | 420.7404                         | 1                  | 838.4581                            | 838.4605                       | 2.9                |
| <b>2</b>        | C <sub>29</sub> H <sub>54</sub> N <sub>12</sub> O <sub>6</sub> | 667.4362                            | 667.4373                       | 1.6                | 334.2217                              | 334.2211                         | -1.8               | 665.4217                            | 665.4248                       | 4.7                |
| <b>3</b>        | C <sub>28</sub> H <sub>55</sub> N <sub>13</sub> O <sub>6</sub> | 670.4471                            | 670.4477                       | 0.9                | 335.7272                              | 335.7272                         | 0                  | 668.4326                            | 668.4334                       | 1.2                |
| <b>4</b>        | C <sub>27</sub> H <sub>52</sub> N <sub>12</sub> O <sub>6</sub> | 641.4206                            | 641.4207                       | 0.2                | 321.2139                              | 321.2157                         | 5.6                | 639.4060                            | 639.4053                       | -1.1               |
| <b>5</b>        | C <sub>29</sub> H <sub>54</sub> N <sub>12</sub> O <sub>8</sub> | 699.4260                            | 699.4273                       | 1.9                | 350.2167                              | 350.2158                         | 2.6                | 697.4115                            | 697.4135                       | 2.9                |
| <b>6</b>        | C <sub>27</sub> H <sub>50</sub> N <sub>12</sub> O <sub>6</sub> | 639.4049                            | 639.4078                       | 4.5                | 320.2061                              | 320.2056                         | -1.6               | 637.3904                            | 637.3900                       | -0.6               |
| <b>7</b>        | C <sub>29</sub> H <sub>50</sub> N <sub>12</sub> O <sub>6</sub> | 663.4049                            | 663.4066                       | 2.6                | 332.2061                              | 332.2058                         | -0.9               | 661.3904                            | 661.3929                       | 3.8                |
| <b>8</b>        | C <sub>37</sub> H <sub>66</sub> N <sub>12</sub> O <sub>6</sub> | 775.5301                            | 775.5331                       | 3.9                | 388.2687                              | 388.2685                         | 0.5                | 773.5156                            | 773.5177                       | 2.7                |
| <b>9</b>        | C <sub>29</sub> H <sub>56</sub> N <sub>14</sub> O <sub>6</sub> | 697.4580                            | 697.4595                       | 2.2                | 349.2326                              | 349.2319                         | -2.0               | 695.4434                            | 695.4428                       | -0.9               |
| <b>10</b>       | C <sub>39</sub> H <sub>58</sub> N <sub>12</sub> O <sub>6</sub> | 791.4675                            | 791.4695                       | 1.1                | 396.2375                              | 396.2379                         | 1.0                | 789.4582                            | 789.4585                       | 0.4                |
| <b>11</b>       | C <sub>28</sub> H <sub>55</sub> N <sub>13</sub> O <sub>7</sub> | 686.4420                            | 686.4440                       | 2.9                | 343.7246                              | 343.7246                         | 0                  | 684.4275                            | 684.4279                       | 0.6                |
| <b>12</b>       | C <sub>27</sub> H <sub>53</sub> N <sub>13</sub> O <sub>6</sub> | 656.4315                            | 656.4342                       | 4.1                | 328.7194                              | 328.7198                         | 1.2                | 654.4169                            | 654.4188                       | 2.9                |
| <b>13</b>       | C <sub>28</sub> H <sub>53</sub> N <sub>13</sub> O <sub>6</sub> | 668.4315                            | 668.4345                       | 4.5                | 334.7194                              | 334.7182                         | -3.6               | 666.4169                            | 666.4183                       | 2.1                |
| <b>14</b>       | C <sub>32</sub> H <sub>61</sub> N <sub>13</sub> O <sub>6</sub> | 724.4941                            | 724.4960                       | 2.6                | 362.7507                              | 362.7503                         | -1.1               | 722.4795                            | 722.4824                       | 4.0                |
| <b>15</b>       | C <sub>28</sub> H <sub>56</sub> N <sub>14</sub> O <sub>6</sub> | 685.4580                            | 685.4594                       | 2.0                | 343.2326                              | 343.2317                         | -2.6               | 683.4434                            | 683.4444                       | 1.5                |
| <b>16</b>       | C <sub>33</sub> H <sub>57</sub> N <sub>13</sub> O <sub>6</sub> | 732.4628                            | 732.4628                       | 3.4                | 366.7350                              | 366.7350                         | 0                  | 730.4482                            | 730.4484                       | 0.3                |
| <b>17</b>       | C <sub>27</sub> H <sub>52</sub> N <sub>12</sub> O <sub>7</sub> | 657.4155                            | 657.4173                       | 2.7                | 329.2114                              | 329.2120                         | 1.8                | 655.4009                            | 655.4016                       | 1.1                |
| <b>18</b>       | C <sub>26</sub> H <sub>50</sub> N <sub>12</sub> O <sub>6</sub> | 627.4049                            | 627.4078                       | 4.6                | 314.2061                              | 314.2066                         | 1.6                | 625.3904                            | 625.3924                       | 3.2                |
| <b>19</b>       | C <sub>27</sub> H <sub>50</sub> N <sub>12</sub> O <sub>6</sub> | 639.4049                            | 639.4078                       | 4.5                | 320.2061                              | 320.2060                         | -0.3               | 637.3904                            | 637.3886                       | -2.8               |
| <b>20</b>       | C <sub>31</sub> H <sub>58</sub> N <sub>12</sub> O <sub>6</sub> | 695.4675                            | 695.4706                       | 4.5                | 348.2374                              | 347.2371                         | -0.9               | 693.4530                            | 693.4547                       | 2.4                |
| <b>21</b>       | C <sub>27</sub> H <sub>53</sub> N <sub>13</sub> O <sub>6</sub> | 656.4315                            | 656.4336                       | 3.2                | 328.1794                              | 328.7200                         | 1.8                | 654.4169                            | 654.4164                       | -0.7               |
| <b>22</b>       | C <sub>32</sub> H <sub>54</sub> N <sub>12</sub> O <sub>6</sub> | 703.4362                            | 703.4396                       | 4.8                | 352.2217                              | 352.2207                         | -2.8               | 701.4217                            | 701.4237                       | 2.9                |

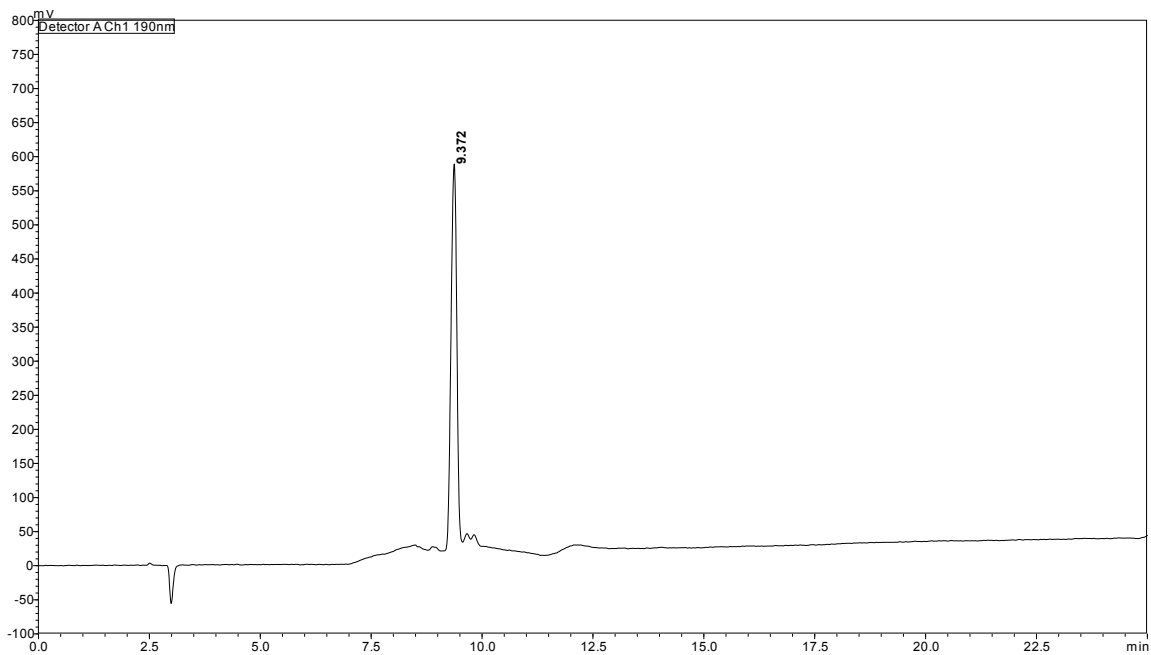

HRMS positive mode

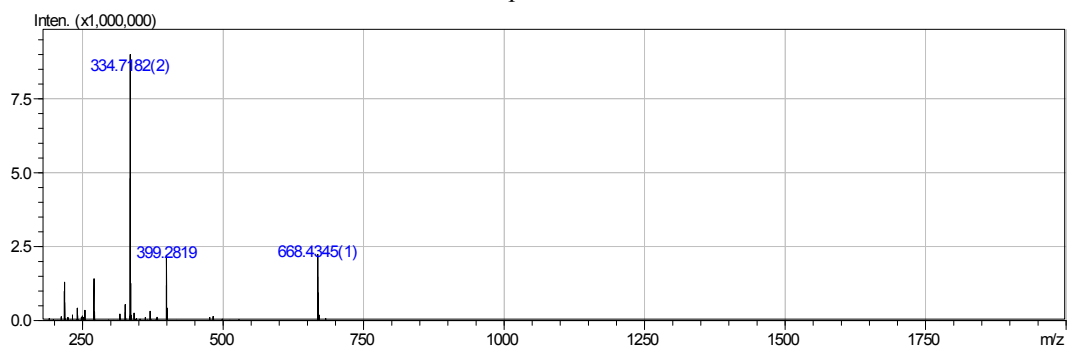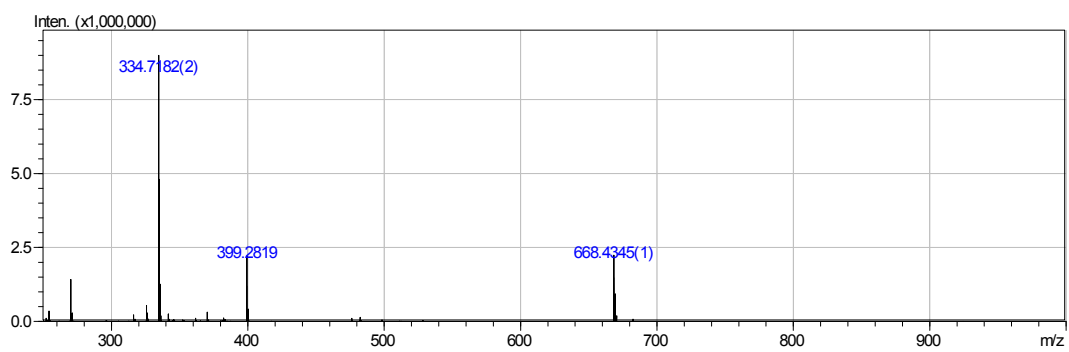

HRMS negative mode

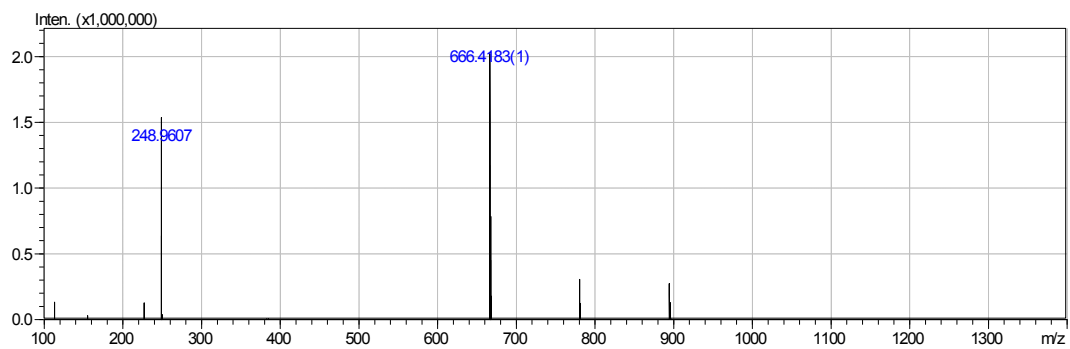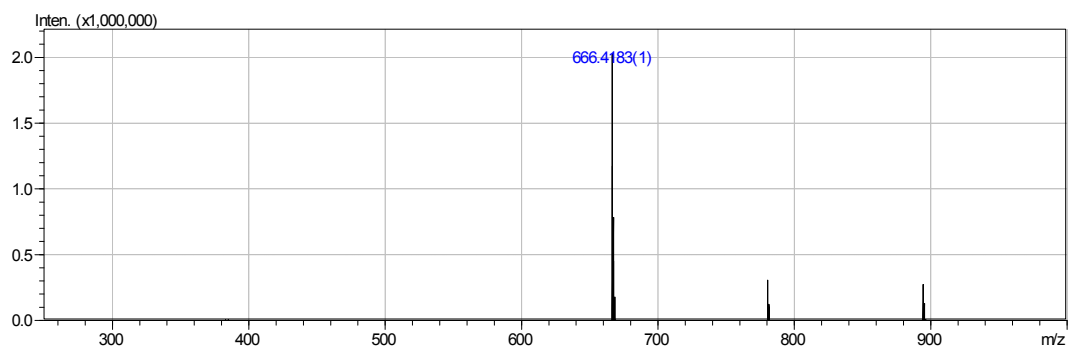

**Figure S1.** HPLC chromatogram (190 nm) and HRMS spectra of purified compound **13**.

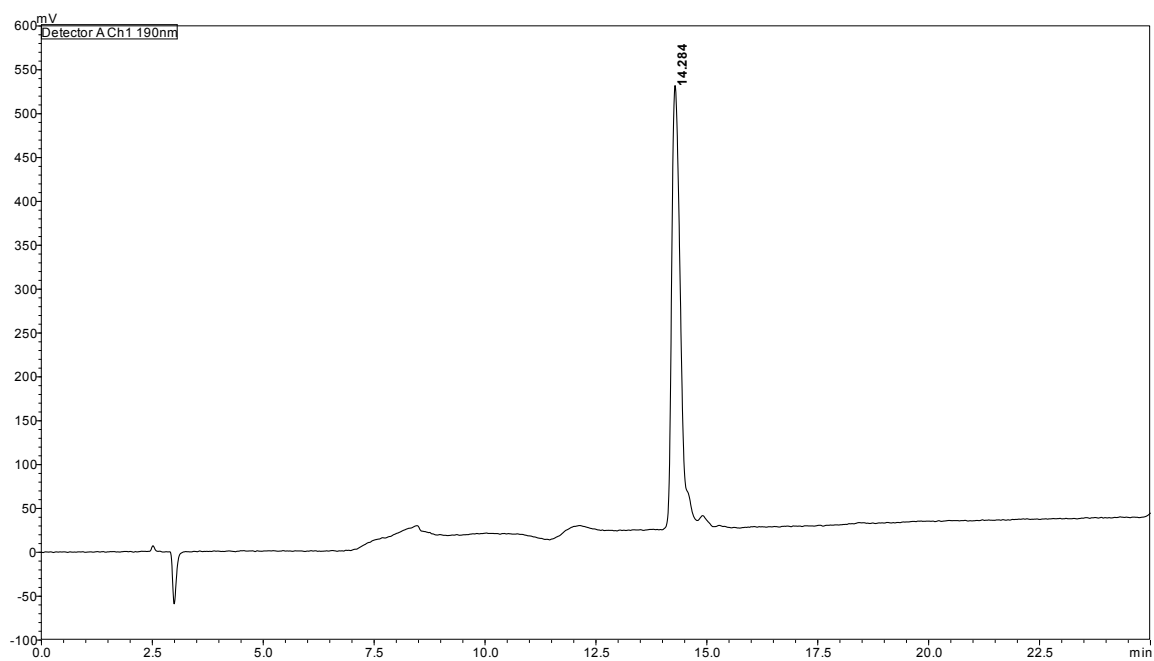

HRMS positive mode

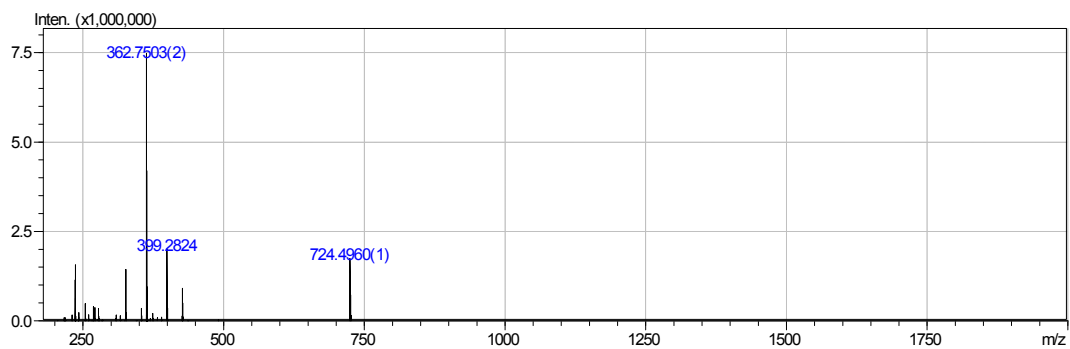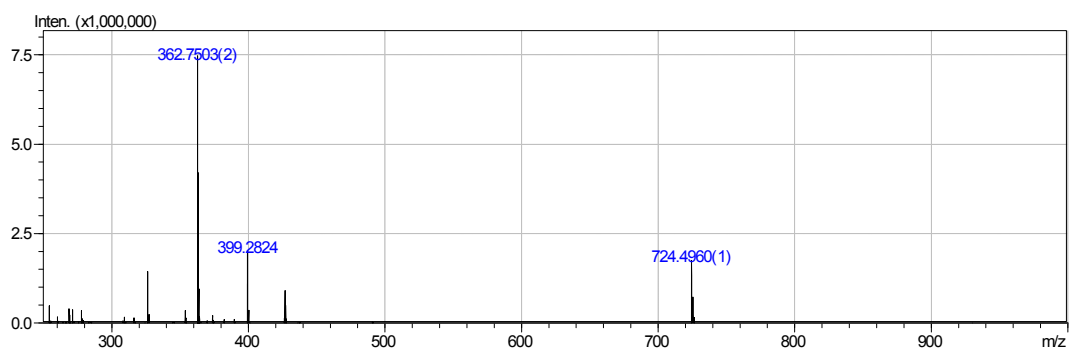

### HRMS negative mode

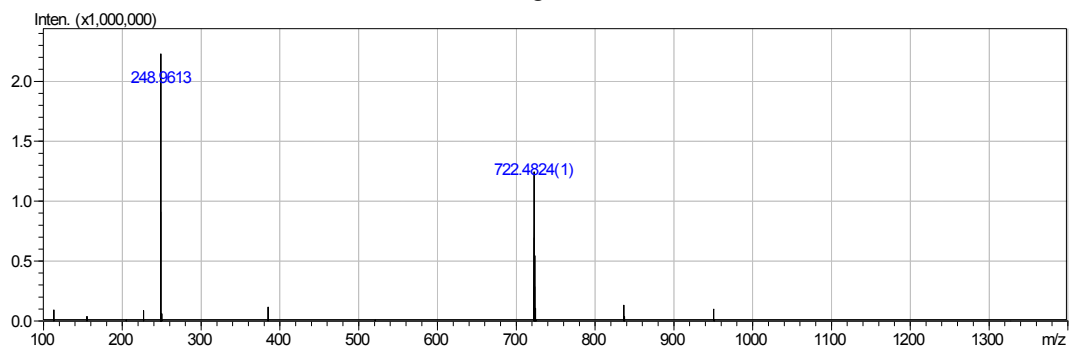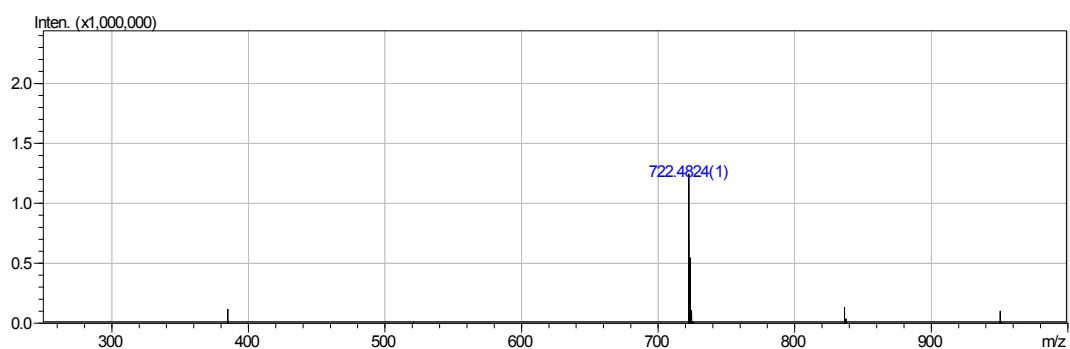

**Figure S2.** HPLC chromatogram (190 nm) and HRMS spectra of purified compound **14**.

**3. Analytical data of plasma degradation.** Analysis of plasma degradation products was carried out by HPLC-ESI-Q-MS with a Prominence HPLC system (binary pump system LC-20AD and autosampler SIL-20AC HT coupled to a SPD-20A UV detector and LCMS-2020

quadrupole mass detector). Chromatographic separation was achieved on Phenomenex Jupiter Proteo C12 column (250 × 4.6 mm) at 35°C. Mobile phases consisted of H<sub>2</sub>O:TFA (99.95:0.05 v/v, phase A) and ACN:TFA (99.95:0.05 v/v, phase B) at a flow rate of 1.2 mL/min. The eluent was split at a ratio of 1:3 after UV-detector to reduce flow for MS to 0.3 mL/min.

Elution was performed with a gradient as follows: t = 20 min., 0% - 18% B. The injection volume was 15 µL. UV spectra were recorded at 200 nm. Retention time is only given for untouched compound and identified degradation products. Rest of the signals were not identified and are supposedly from plasma and its natural degradation in time.

The electrospray ionization (ESI) was operated in positive and negative mode. Nitrogen was used as nebulizing gas, set at 1.5 ml/min and as a drying gas set at 17 ml/min. Desolvation line and heat block temperature were set at 250°C and 300°C respectively. Needle voltage was set at +4.5 kV (positive mode) and -4.5kV (negative mode). Detector voltage was set to -1.25kV. Mass spectrometer was used in scan mode in range 150-1000 m/z.

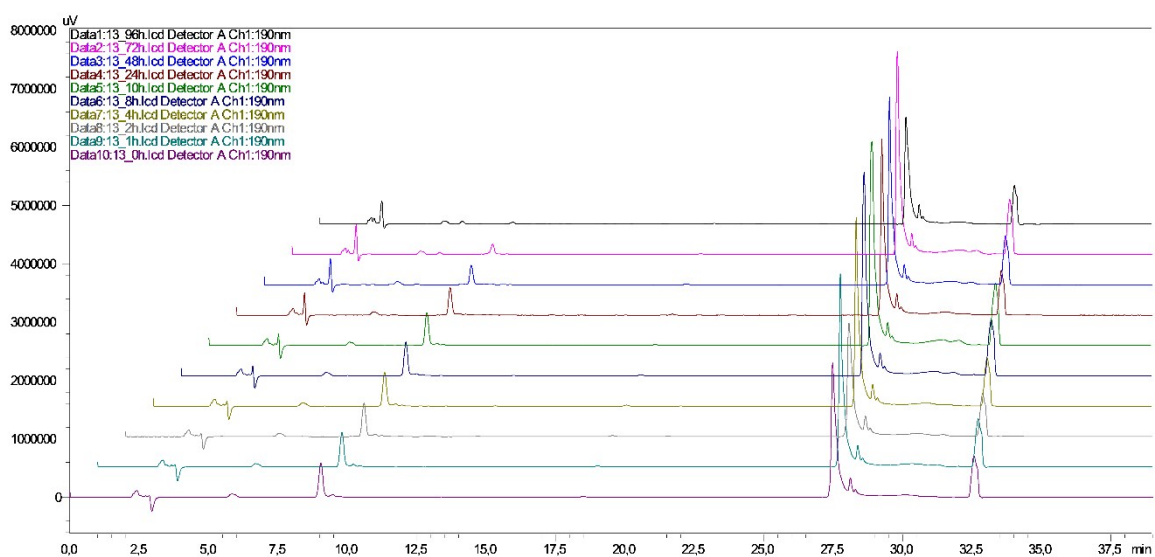

**Figure S3.** Full chromatogram of **13** after degradation in different time intervals



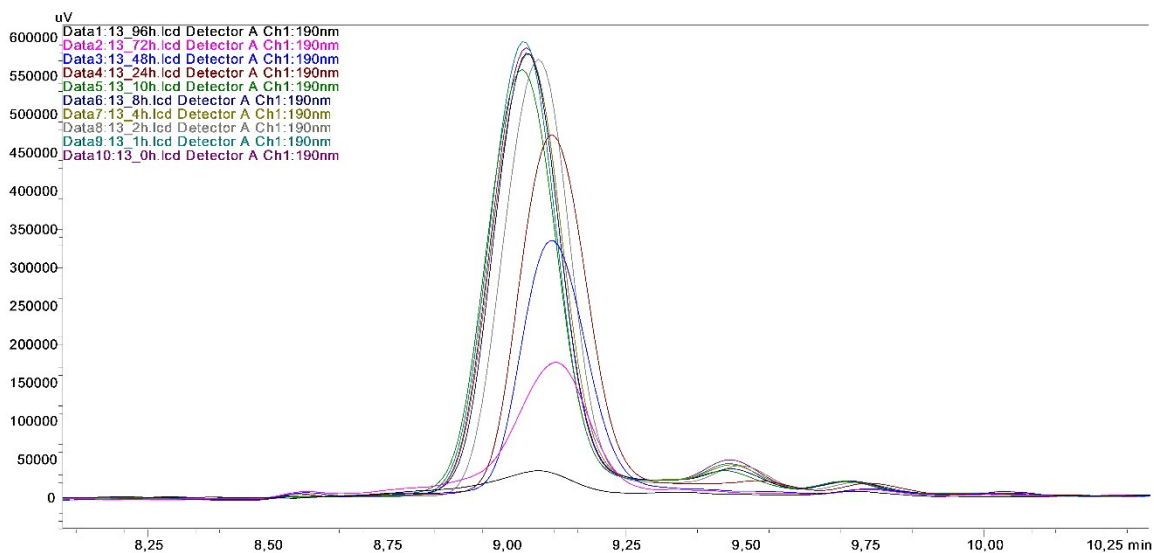

Figure S4. Zoom on 13 signal after degradation in different time intervals.

| Time [h] | Area    | Area [%] |
|----------|---------|----------|
| 0        | 5678319 | 100      |
| 24       | 4467576 | 79       |
| 48       | 2994031 | 53       |
| 72       | 1640084 | 29       |
| 96       | 285416  | 5        |

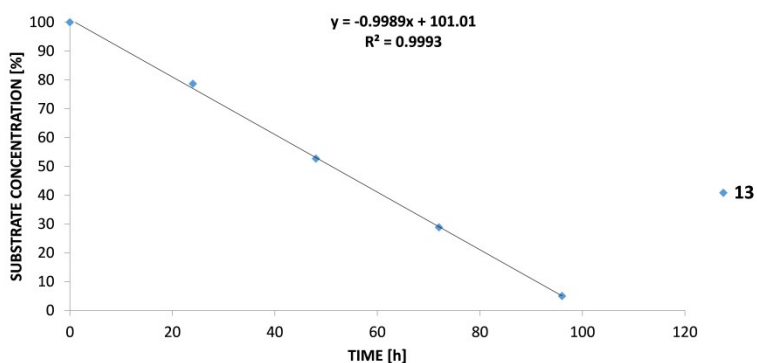

Figure S5. Data used for  $t_{1/2}$  estimation of compound 13.

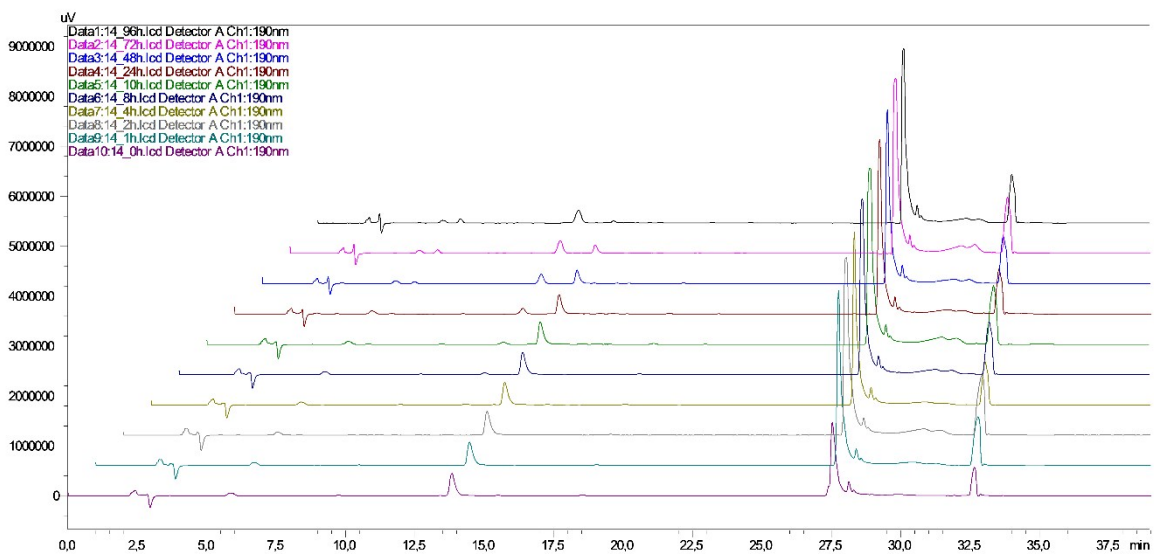

Figure S6. Full chromatogram of 14 after degradation in different time intervals.

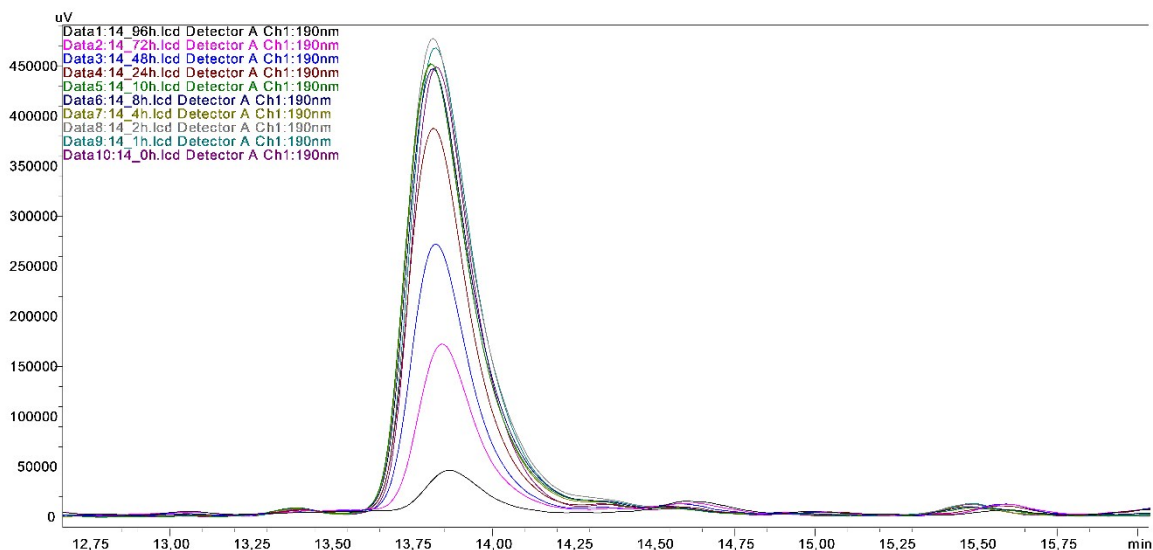

Figure S7. Zoom 14 signal after degradation in different time intervals.

| Time [h] | Area    | Area [%] |
|----------|---------|----------|
| 0        | 6033449 | 100      |
| 24       | 5104299 | 85       |
| 48       | 3416511 | 57       |
| 72       | 2055290 | 34       |
| 96       | 500172  | 8        |

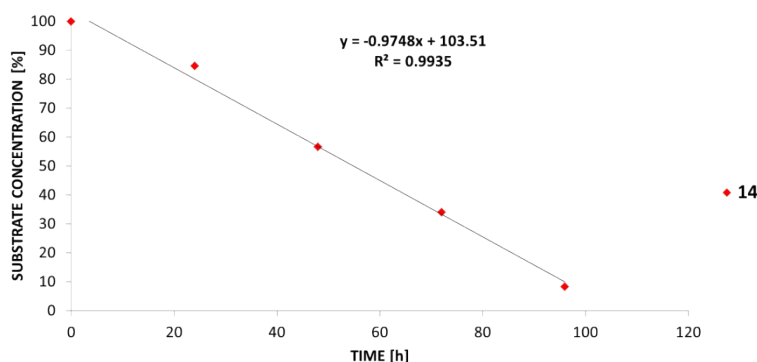

Figure S8. Data used for  $t_{1/2}$  estimation of compound 14.

The electrospray ionization (ESI) was operated in positive and negative mode. Nitrogen was used as nebulizing gas, set at 1.5 ml/min and as a drying gas set at 17 ml/min. Desolvation line and heat block temperature were set at 250°C and 300°C respectively. Needle voltage was set at +4.5 kV (positive mode) and -4.5kV (negative mode). Detector voltage was set to -1.25kV. Mass spectrometer was used in scan mode in range 150-1000 m/z.

**Table S3.** Identified products of **13** after 96h of incubation in human plasma.

| Structure                                                                         | RT [min] | [M+H] <sup>+</sup> <sub>calc.</sub> | [M+H] <sup>+</sup> <sub>found</sub> |
|-----------------------------------------------------------------------------------|----------|-------------------------------------|-------------------------------------|
| 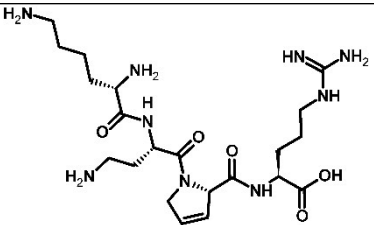 | 2.79     | 498.3                               | 498.5                               |
|  | 2.94     | 189.1                               | 189.9                               |
|  | 2.94     | 317.2                               | 317.7                               |

**Table S4.** Identified products of **14** after 96h of incubation in human plasma.

| Structure                                                                           | RT [min] | [M+H] <sup>+</sup> <sub>calc.</sub> | [M+H] <sup>+</sup> <sub>found</sub> |
|-------------------------------------------------------------------------------------|----------|-------------------------------------|-------------------------------------|
| 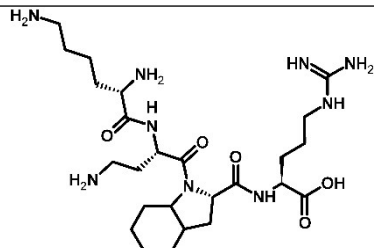 | 11.3     | 554.5                               | 554.4                               |
|  | 2.96     | 189.1                               | 189.9                               |
|  | 12.4     | 426.3                               | 426.6                               |

**4. Dose-response curves of the best analogues used to calculate IC<sub>50</sub> values.** The concentration-dependent inhibitory dose-curve data were plotted as percentage inhibition normalized to controls with applied curve fits calculated using GraphPad Prism. Data are presented as log(inhibitor) versus normalized response-variable slope. Error bars are representing means +/- SEM for 3 independent experiments.

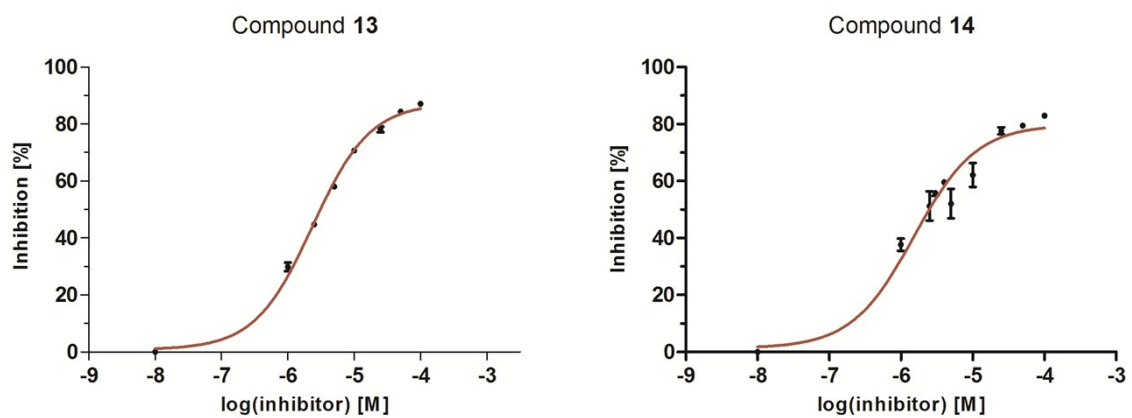

Figure S9. Dose-response curves of compounds 13 and 14.
